1 **TITLE**

2 An open-source control system for in vivo fluorescence measurements from deep-brain  
3 structures

4

5 **AUTHORS**

6 Scott F. Owen<sup>1,\*</sup> and Anatol C. Kreitzer<sup>1,2,3,4,5</sup>

7 <sup>1</sup>Gladstone Institutes, <sup>2</sup>Department of Neurology, UCSF, <sup>3</sup>Kavli Institute for Fundamental  
8 Neuroscience, <sup>4</sup>UCSF Weill Institute for Neurosciences, <sup>5</sup>Department of Physiology, UCSF

9 \* Correspondence to [sfowen@gmail.com](mailto:sfowen@gmail.com)

10

11 **ARTICLE TYPE**

12 Research Paper

13

14 **ABSTRACT**

15 *Background.* Intracranial photometry through chronically implanted optical fibers is a widely  
16 adopted technique for measuring signals from fluorescent probes in deep-brain structures. The  
17 recent proliferation of bright, photo-stable, and specific genetically-encoded fluorescent  
18 reporters for calcium and for other neuromodulators has greatly increased the utility and  
19 popularity of this technique.

20 *New Method.* Here we describe an open-source, cost-effective, microcontroller-based solution  
21 for controlling optical components in an intracranial photometry system and processing the  
22 resulting signal.

23 *Results.* We show proof-of-principle that this system supports high quality intracranial  
24 photometry recordings from dorsal striatum in freely moving mice. A single system supports  
25 simultaneous fluorescence measurements in two independent color channels, but multiple  
26 systems can be integrated together if additional fluorescence channels are required. This  
27 system is designed to work in combination with either commercially available or custom-built  
28 optical components. Parts can be purchased for less than one tenth the cost of commercially  
29 available alternatives and complete assembly takes less than one day for an inexperienced  
30 user.

31 *Comparison with Existing Method(s).* Currently available hardware draws on a variety of  
32 commercial, custom-built, or hybrid elements for both optical and electronic components. Many  
33 of these hardware systems are either specialized and inflexible, or over-engineered and  
34 expensive.

35 *Conclusions.* This open-source system increases experimental flexibility while reducing cost  
36 relative to current commercially available components. All software and firmware are open-  
37 source and customizable, affording a degree of experimental flexibility that is not available in  
38 current commercial systems.

## 39 INTRODUCTION

40 Intracranial volumetric imaging of population-level fluorescence signals through optical fibers  
41 (photometry) has been possible for more than a decade (Adelsberger, Garaschuk et al. 2005).  
42 Recently, however, the utility and popularity of this technique has increased dramatically,  
43 through improvements in brightness and signal-to-noise of genetically-encoded fluorescence  
44 indicators (Cui, Jun et al. 2013, Gunaydin, Grosenick et al. 2014, Lerner, Shilyansky et al. 2015,  
45 Kim, Yang et al. 2016), most notably the GCaMP family of genetically-encoded calcium  
46 indicators (Akerboom, Chen et al. 2012, Chen, Wardill et al. 2013). In addition, the growing  
47 availability of specific genetically encoded fluorescent indicators for detection of  
48 neuromodulators (Jing, Zhang et al. 2018, Patriarchi, Cho et al. 2018, Sun, Zeng et al. 2018),  
49 voltage (Gong, Huang et al. 2015), and complementary cell signaling processes (Miesenbock,  
50 De Angelis et al. 1998, Okumoto, Looger et al. 2005, Li and Tsien 2012, Gong, Wagner et al.  
51 2014, San Martin, Ceballo et al. 2014, Marshall, Li et al. 2016) highlights the rapidly expanding  
52 versatility of this technique. These advances have driven the development of commercially  
53 available hardware capable of replacing custom-built systems and are lowering the barriers to  
54 entry for new labs to adopt this technique. However, the electronics to control these  
55 commercially available optical systems are either over-engineered (capable of acquiring many  
56 more channels at much higher acquisition rates than required) or lack the flexibility to be  
57 customized for all applications. Open-source solutions can address these shortcomings by  
58 providing a complete, cost-effective system that can be customized as necessary by each user  
59 for the needs of any specific experiment.

60 A typical photometry system consists of three components: (1) a short length of optical fiber  
61 that is stereotaxically guided to the brain region of interest and then permanently cemented to  
62 the skull, (2) a set of optical components to generate excitation light and detect fluorescence  
63 emission, and (3) electronics to control light delivery and digitize the resulting fluorescence  
64 signal (Figure 1). For the first component, the most widely used implants are essentially  
65 identical to the fiber-ferrule assemblies used for light delivery in optogenetics experiments,  
66 which have been established and iteratively improved by a large community for more than a  
67 decade (Aravanis, Wang et al. 2007, Sparta, Stamatakis et al. 2011). For the second  
68 component, recently-released optical elements that are specialized for this type of recording  
69 offer excellent ease-of-use and signal-to-noise at a cost that is comparable to more  
70 cumbersome first-generation setups (Gunaydin, Grosenick et al. 2014, Simone, Fuzesi et al.  
71 2018). For the third component, a specialized set of electronics are required to control the  
72 fluorescence excitation light and to process the resulting fluorescence emission signal. Here we  
73 describe the design, construction, and implementation of a low-cost, open-source system for  
74 control, recording, on-line visualization, and post-hoc analysis of *in vivo* photometry  
75 experiments. This system is designed to operate together with commercially available optical  
76 components (e.g. Doric Lenses, Thorlabs) as well as open-source (Delmans 2018, Simone,  
77 Fuzesi et al. 2018) and hybrid systems (<https://sites.google.com/view/multifp/hardware>), and  
78 has the ability to monitor synchronization signals to support integration of recordings with  
79 additional stimulation or recording equipment. This design supports two independent color  
80 channels and can be assembled by an inexperienced user in less than a day, for approximately  
81 one tenth the cost of commercially available systems. Most importantly, as both physiological  
82 and behavioral experiments become increasingly complex, the open-source architecture allows  
83 unlimited range to expand, modify, customize and adapt the system to suit the requirements of  
84 any specific experiment.

85

## 86 RESULTS

87 A key challenge in the design and implementation of an intracranial photometry  
88 fluorescence recording system is establishing the extent to which the measurement reflects the  
89 true fluorescence signal in the brain. Two distinct approaches have been established to address  
90 this problem. The first approach splits the fluorescence signal into multiple different channels  
91 based on wavelength and relies on spectral unmixing to isolate the true fluorescence signal in  
92 one expected channel from non-specific background fluctuations that are expected to spread  
93 across multiple wavelengths (Cui, Jun et al. 2013, Cui, Jun et al. 2014, Meng, Zhou et al. 2018).  
94 An alternative approach, which avoids the requirement for complex time-correlated single-  
95 photon counting (TCSPC), is to rapidly oscillate the excitation light and use post-hoc processing  
96 to isolate the specified component of the fluorescence signal (Gunaydin, Grosenick et al. 2014).  
97 In this second approach, it is the temporal characteristics of the fluorescent signal (frequency  
98 and phase of the amplitude oscillation) rather than the wavelength that are used to isolate the  
99 fluorescence emission signal from background light. Both methods are effective for removing  
100 background light and noise sources from the fluorescence signal, or for isolating distinct color  
101 channels from one another within the same preparation. The system described here employs  
102 the second approach, oscillating the fluorescence excitation light independently for two separate  
103 color channels. Notably, neither approach is completely immune to noise sources or  
104 experimental confounds, especially those caused by movement of the animal or flexing of the  
105 fiber-optic cable. To identify and exclude those sources of noise, it is important to record from a  
106 stable, non-fluctuating fluorescence source such as EGFP or tdTomato. These control  
107 recordings can be performed in a separate control cohort of animals, or alongside the primary  
108 recordings using a second color channel as described below.

109 The electronics required to operate a photometry system require little more than a sine-wave  
110 generator and a low-cost digitizer. However, it is useful in the day-to-day execution of  
111 experiments to have a dynamic, on-line estimate of the fluorescence signal amplitude. Here, we  
112 describe a newly developed, open-source system that supports all these features. This system  
113 is based on commercially available microcontrollers and electronic components, freely-available  
114 open-source firmware (for the MBED microcontroller) and post-hoc analysis software (Matlab  
115 script). It can be assembled in less than a day by an inexperienced user for a total cost of \$500-  
116 \$1,000; about one tenth the cost of current commercially available systems.

117 The core of this system is an MBED Cortex LPC1768 programmable microcontroller (Figure  
118 2A). This microcontroller generates two continuously oscillating sine wave outputs to drive  
119 excitation light for two independent fluorescence channels (LED). The amplitude (0-3.3 V) and  
120 frequency (0-500 Hz) of each oscillation is controlled through four user-defined command  
121 voltages (variable resistors). Digital displays provide a readout of each oscillation frequency so  
122 that harmonic interference between fluorescence excitation and oscillating signals in the  
123 environment (e.g. 60 Hz room lights, or optogenetic stimulation pulse trains) can be avoided.  
124 Two switches pause the LED oscillations for each channel. This allows excitation light power to  
125 be measured accurately during the setup of an experiment and permits the user to perform  
126 experiments with steady rather than oscillating excitation light if desired. A “recording” switch  
127 suspends all user input to ensure stable conditions during recording or execution of an  
128 experiment, even if the user bumps a knob. The microcontroller also monitors the oscillating  
129 fluorescence signal from each channel and calculates a Fast-Fourier Transform (FFT) from

130 each channel to determine the signal power at the frequency of the excitation LED oscillation.  
131 This provides a continuously updated estimate of this fluorescence signal for each channel. On-  
132 line estimates of the fluorescence signal are calculated by the microcontroller approximately  
133 once every ~80 ms, using a ~100 ms sliding window. The time delay caused by the filter lag and  
134 the microcontroller processing steps introduce a total lag of ~250 ms for the estimated signal  
135 relative to the “true” fluorescence calculated post-hoc using a zero-lag filter. This delay is  
136 relatively small compared to the time course of most bulk fluorescent transients recorded *in vivo*  
137 (Cui, Jun et al. 2013, Gunaydin, Grosenick et al. 2014, Lerner, Shilyansky et al. 2015, Sun,  
138 Zeng et al. 2018), but is important to correct with appropriate post-hoc processing in cases  
139 where fine timescale alignment of fluorescent transients to behavior or to complementary  
140 physiological signals is required.

141 Simultaneous execution of these operations on a single microcontroller is made possible by  
142 the multi-threaded structure supported on the MBED cortex LPC1768 (Figure 2B). Briefly, three  
143 continuously repeating loops run in parallel. The first loop updates the frequency displays. The  
144 second loop calculates the amplitude of the oscillating fluorescent signal. The third loop controls  
145 the sine wave generation for the oscillating excitation LEDs.

146 All essential signals are recorded and digitized at ~5 kHz with a commercially available  
147 digitizer (National Instruments USB-6009) and freely available software (WinEDR,  
148 [http://spider.science.strath.ac.uk/sipbs/software\\_ses.htm](http://spider.science.strath.ac.uk/sipbs/software_ses.htm)), including the excitation LED driver  
149 signals, the raw fluorescent emission signal, and the on-line estimates of the fluorescent  
150 signals. Simultaneous digitization of additional synchronization inputs allows the fluorescence  
151 signal to be aligned precisely to other physiological manipulations or behavior. The entire  
152 system, including digitizer, is contained in a compact box and can be readily moved from one  
153 experimental setup to another as needed (Figure 2C).

154 Assembly of this system is rapid and straightforward, requiring less than a day for a naïve  
155 user with modest soldering experience. Briefly, the microcontroller, BNC connectors, switches,  
156 variable resistors, resistors, capacitors, and connectors are soldered into the custom-designed  
157 printed circuit board. The MBED microcontroller is then connected to a computer via USB (it  
158 appears as a USB “thumb drive”) and the firmware is and copied onto the microcontroller. The  
159 driver for the digitizer card is installed on the computer as well as the acquisition software  
160 (WinEDR, link above). The digitizer is plugged into the printed circuit board and connected to  
161 the computer by USB. The control system is then placed into its enclosure. Two BNC cables  
162 connect the control system to the LED drivers, and a further two BNC cables connect the  
163 photodiodes to the control system. A USB cable connects the digitizer to the acquisition  
164 computer, and a 5V power supply provides power. A complete list of parts, pre-compiled  
165 firmware, source-code, and all materials as well as a more detailed description of the assembly  
166 process is available here <https://hackaday.io/project/160397>.

167 To test this system, we injected adeno-associated virus to express the genetically-encoded  
168 calcium indicator GCaMP6m in a Cre-dependent manner (AAV-Flex-GCaMP6m) into the dorso-  
169 medial striatum of an A2a-Cre BAC transgenic mouse. This drives expression of the calcium  
170 indicator selectively in striatal medium spiny neurons (MSNs) belonging to the indirect pathway  
171 (Cui, Jun et al. 2013). We implanted a short length of optical fiber (400  $\mu\text{m}$  diameter)  
172 approximately 100  $\mu\text{m}$  above the center of the virus infection zone and cemented the implant to  
173 the mouse skull. Fluorescence excitation light was generated by a pair of LEDs (Doric lenses)  
174 and routed through a specialized “Fluorescence mini cube” (Doric Lenses) containing pre-

175 aligned lenses, fiber couplers, and dichroic mirrors to split excitation and emission channels  
176 based on wavelength. Emission light was collected separately for each fluorescence channel  
177 with a pair of Newport 2151 Femtowatt detectors.

178 One standard experimental configuration requiring a two-color photometry system uses a  
179 green channel to track a fluorescent sensor (e.g. GCaMP) and a red channel to simultaneously  
180 track a static control indicator (e.g. tdTomato). In the specific case of GCaMP indicators,  
181 however, an elegantly simple alternative control is possible. Excitation of GCaMP at the  
182 standard wavelength for green fluorescence (465 nm) produces a robust calcium-dependent  
183 signal; in contrast, blue-shifted excitation light (405 nm) drives a calcium-independent (isosbestic)  
184 fluorescence from the same indicator. This second isosbestic wavelength provides a calcium-  
185 independent signal to control for preparation stability.

186 We therefore delivered excitation light at two separate wavelengths: 405 nm to drive  
187 isosbestic fluorescence (Figure 3, left column), and 465 nm to drive a calcium-dependent  
188 fluorescent signal (Figure 3, right column). To ensure adequate separation of the two  
189 fluorescent signals, the intensity of light at each wavelength was independently modulated at  
190 different frequencies. Importantly, each oscillation frequency must be rapid relative to the  
191 timescale of the signal fluctuations to be detected, but slower than the detection speed of the  
192 photodiode and digitizer. In our hands, oscillation frequencies in the range of 100-400 Hz meet  
193 these criteria. To avoid generating harmonic interference, each frequency must not be a multiple  
194 (or near multiple) of the other frequency, or of any oscillating signal in the environment, such as  
195 room lights (60 Hz) or optogenetic stimulation pulse trains. Based on these criteria and empirical  
196 testing, we selected 217 Hz as the oscillation frequency for the 465 nm calcium-dependent  
197 fluorescence channel, and 319 Hz as the frequency for the 405 nm isosbestic signal.

198 In our validation recording, the fluorescence emission from the isosbestic channel (405 nm  
199 excitation light) appeared as an oscillation that was phase-locked to the LED driver signal  
200 (Figure 3A,C,E). The fluorescence emission signal from the calcium-sensitive channel (465 nm  
201 excitation light) exhibited a more complex structure (Figure 3B,D,F), consistent with this signal  
202 arising from a summation of the isosbestic and calcium-sensitive fluorescence signals. The  
203 cross-talk between these two channels was readily isolated by using a Fast-Fourier Transform  
204 (FFT) to calculate the local power spectrum of the signal across a sliding time window. The  
205 single peak in the power spectrum for the isosbestic signal confirmed the specificity of this  
206 fluorescence measurement (Figure 3G). In contrast, the power spectrum from the calcium-  
207 sensitive fluorescence channel contained two fully separated peaks corresponding to the  
208 calcium-sensitive fluorescence (green arrow) and the cross-talk from the isosbestic  
209 fluorescence signal (blue arrow) (Figure 3H).

210 The amplitude of the calcium-sensitive fluorescence signal was calculated by measuring  
211 peak of the power spectrum at the frequency dictated by the oscillation of the calcium-sensitive  
212 fluorescence excitation light (green arrow). By repeating this calculation over a sliding time  
213 window, the fluorescence signal for each channel was calculated as a function of time,  
214 independent of the other fluorescence channel or background light contamination. As expected,  
215 the fluorescence signal from the isosbestic channel was stable over time (Figure 3I), while the  
216 calcium-sensitive fluorescence channel showed robust fluctuations (Figure 3J). The size, shape  
217 and time-course of these fluctuations was consistent with previously reported calcium transients  
218 in similar preparations (Cui, Jun et al. 2013, Meng, Zhou et al. 2018). In some cases, such as  
219 when significant fluctuations are detected in the control fluorescence channel, it may be

220 desirable to normalize the calcium-dependent fluorescence by the instantaneous control signal  
221 amplitude to correct for this noise in the primary signal. When the control signal is stable,  
222 however, it often makes sense to skip this normalization, because dividing one experimentally  
223 measured signal by another will increase the noise in the final signal.

224 To align calcium fluorescence signals to behavior, we recorded fluorescence continuously  
225 for 10 min (Figure 4A,B) while monitoring animal locomotion using an overhead camera (Figure  
226 4C). Synchronization pulses generated by the behavioral monitoring system (Ethovision 10,  
227 Noldus Inc) were digitized by the photometry recording system together with the fluorescence  
228 measurements (see methods). Consistent with previous reports (Cui, Jun et al. 2013, Meng,  
229 Zhou et al. 2018), turns or orienting movements towards the direction contralateral to the  
230 recording site in dorsomedial striatum were correlated with peaks in the fluorescent signal on  
231 the calcium-dependent channel (Figure 4D). In contrast, turns or orienting movements towards  
232 the ipsilateral side were associated with troughs, or the absence of peaks, in the fluorescence  
233 signal (Figure 4E). No peaks or behaviorally-aligned changes were detected in the isosbestic  
234 control signal, consistent with the transients in the calcium-dependent channel representing  
235 well-isolated calcium signals with minimal contamination from movement artifacts or  
236 environmental light sources.

237

## 238 **CONCLUDING REMARKS**

239 Photometry is an increasingly important tool with a growing variety of applications in  
240 neuroscience. Optical components are readily available for commercial, open-source, and  
241 hybrid systems. The electronics that control these optics, however, are either over-engineered  
242 and expensive or lack the flexibility and accessibility to be tailored to specific experimental  
243 applications. Here we present a cost-effective, open-source system for controlling the optical  
244 components in a two-color photometry system, digitizing the resulting signals, and performing  
245 post-hoc analysis.

246 *Post-hoc analysis is essential for proper interpretation of signals.*

247 This system uses a microcontroller-based FFT to provide an on-line “preview” of the signal  
248 amplitude and structure, similar to those available on commercial systems. Importantly, this  
249 “preview” analysis should not be treated as the final measurement of the fluorescence signal.  
250 Analysis of the oscillating fluorescence signal requires processing over discrete time windows  
251 that are long enough to contain multiple cycles of each oscillation (Figure 4). On-line analysis  
252 can draw only on time points that have already occurred, using a time window that extends into  
253 the immediate past. This results in a filter-lag that causes the processed signal to trail the true  
254 signal by a duration of approximately half the length of the analysis time window (typically 50-  
255 100 ms). In contrast, post-hoc filtering can use an analysis window that extends to both sides of  
256 each time point and draws on zero-lag filtering methods that are not possible with on-line filters.  
257 This eliminates filter lag as well as any potential computation or signal processing delays, and  
258 ensures that the processed signal more accurately reflects the true fluorescence.

259 *Applications for two-color photometry*

260 Simultaneous measurement of two separate fluorescence channels offers multiple  
261 experimental opportunities. In the specific case of GCaMP indicators, calcium-independent

262 control fluorescence levels can be measured from the calcium sensor itself by utilizing the  
263 calcium-independent isosbestic point in the emission spectrum (Lerner, Shilyansky et al. 2015).  
264 Alternatively, a static indicator in a second fluorescence channel (e.g. tdTomato in the red  
265 channel) can provide a control signal to establish the extent to which fluctuations in the primary  
266 fluorescence signal (e.g. GCaMP in the green channel) may arise from contamination by  
267 environmental light sources, or movement artifacts from the animal, the implant, the optical  
268 fiber, or the experimental apparatus. Perhaps most promisingly, however, recent improvements  
269 in the latest generation of red-shifted calcium indicators (Zhao, Araki et al. 2011, Akerboom,  
270 Carreras Calderon et al. 2013, Wu, Abdelfattah et al. 2014, Inoue, Takeuchi et al. 2015, Dana,  
271 Mohar et al. 2016) complement the widely used GCaMP indicators, allowing dynamic  
272 interactions between distinct, genetically-targeted neuronal populations to be studied in a single  
273 preparation (Markowitz, Gillis et al. 2018).

274 *A growing toolbox of sensors is expanding applications for one- and two-color photometry.*

275 Although GCaMP and other calcium indicators remain the most widely used sensors in  
276 photometry experiments (Cui, Jun et al. 2013, Gunaydin, Grosenick et al. 2014, Lerner,  
277 Shilyansky et al. 2015, Kim, Yang et al. 2016, Meng, Zhou et al. 2018), emerging genetically-  
278 encoded fluorescent sensors for intracellular chloride (Wimmer, Schmitt et al. 2015), voltage  
279 (Gong, Huang et al. 2015), and neuromodulators including acetylcholine (Jing, Zhang et al.  
280 2018), dopamine (Patriarchi, Cho et al. 2018, Sun, Zeng et al. 2018) and others are expanding  
281 the versatility of this technique by permitting sensitive and specific detection of local  
282 neuromodulators through fluorescence signals. The simultaneous development of these new  
283 modulatory sensors alongside improved red-shifted calcium indicators (Zhao, Araki et al. 2011,  
284 Li and Tsien 2012, Akerboom, Carreras Calderon et al. 2013, Wu, Abdelfattah et al. 2014,  
285 Inoue, Takeuchi et al. 2015, Dana, Mohar et al. 2016, Meng, Zhou et al. 2018) suggests it will  
286 now be possible to use two-color photometry to simultaneously measure modulatory signaling  
287 and its impact on specific neuronal populations with a cellular, spatial and temporal precision  
288 that was previously inaccessible in freely moving animals. The low-cost, open-source system  
289 described here is designed to complement commercially available optical components to create  
290 a flexible system capable of exploiting this new and emerging array of tools for a broad range of  
291 neuroscience experiments. Notably, it is also possible to use the same indicator (e.g. GCaMP)  
292 in two spatially distinct but nearby regions in the brain and use separate oscillation frequencies  
293 of the excitation light in each location to limit fluorescence cross-talk between the two signals.  
294 This approach is not possible with a spectral unmixing approach.

295 *Open-source design supports experimental flexibility.*

296 The system described here consists of hardware and firmware for control electronics and  
297 processing of signals. We anticipate that these components will provide a valuable complement  
298 to the recently published open-source tools that focus primarily on optical and opto-electronic  
299 components for similar systems (Simone, Fuzesi et al. 2018). Furthermore, it should be  
300 relatively straightforward to integrate both packages into a single open-source design. Although  
301 the number of available input and output channels on the microcontroller and the digitizer limit  
302 the number of fluorescence channels that can be controlled by a single system using this  
303 design, there is no fundamental barrier to using two or more control boxes in parallel within a  
304 single experiment if more independent channels of fluorescence recording are required. In this  
305 case, the most straightforward solution may be to use two or more of the microcontroller boxes  
306 with minimal modifications to each box, and to replace the digitizer with a single 12- or 16-

307 channel digitizer capable of simultaneously acquiring all necessary channels simultaneously.  
308 The current design, with all channels accessible through BNC connectors on the front of each  
309 box, should facilitate this expansion with minimal additional engineering.

310 The open-source design of this system allows for unlimited customization to suit specific  
311 applications. For example, in long-duration recordings (e.g. over several days for circadian  
312 rhythm, automated learning or extended behavior experiments) it may be desirable to include an  
313 automated, electronic gating of fluorescent excitation light to minimize photobleaching and  
314 phototoxicity. This change can be implemented in minutes by making a simple firmware change  
315 to use the “Sync In” BNC connector to gate fluorescence excitation light. Additional changes are  
316 possible through modification of the available microcontroller code. For example, a user might  
317 implement a firmware system to detect peaks when the fluorescence signal exceeds a certain  
318 threshold and have the microcontroller report those peaks with a TTL output for closed-loop  
319 control of physiological or behavioral equipment within an experiment. We anticipate that this  
320 type of experimental flexibility will be invaluable given the rapidly expanding popularity and  
321 range of applications for photometry across neuroscience and other related fields.

322



323 FIGURES

Figure 1

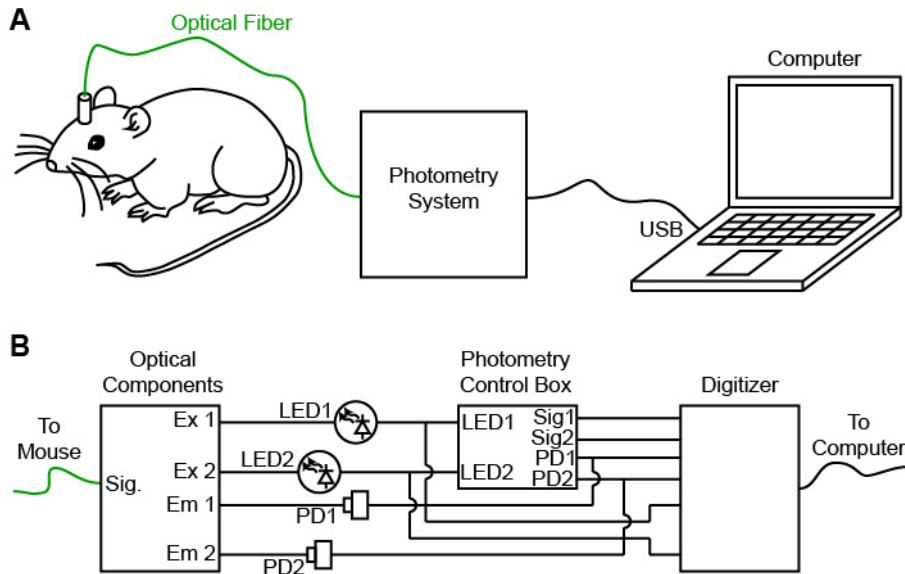

324

325

326 **Figure 1. Design of a low-cost open-source photometry control system.** A, Schematic of  
327 experimental design in which the photometry system delivers fluorescence excitation light,  
328 measures fluorescence emission and passes a digitized signal to the computer. B, Individual  
329 components of the photometry system include optical components (left, dichroic mirrors, fiber  
330 couplers), photometry control box (center) and digitizer for recording (right).

331

Figure 2

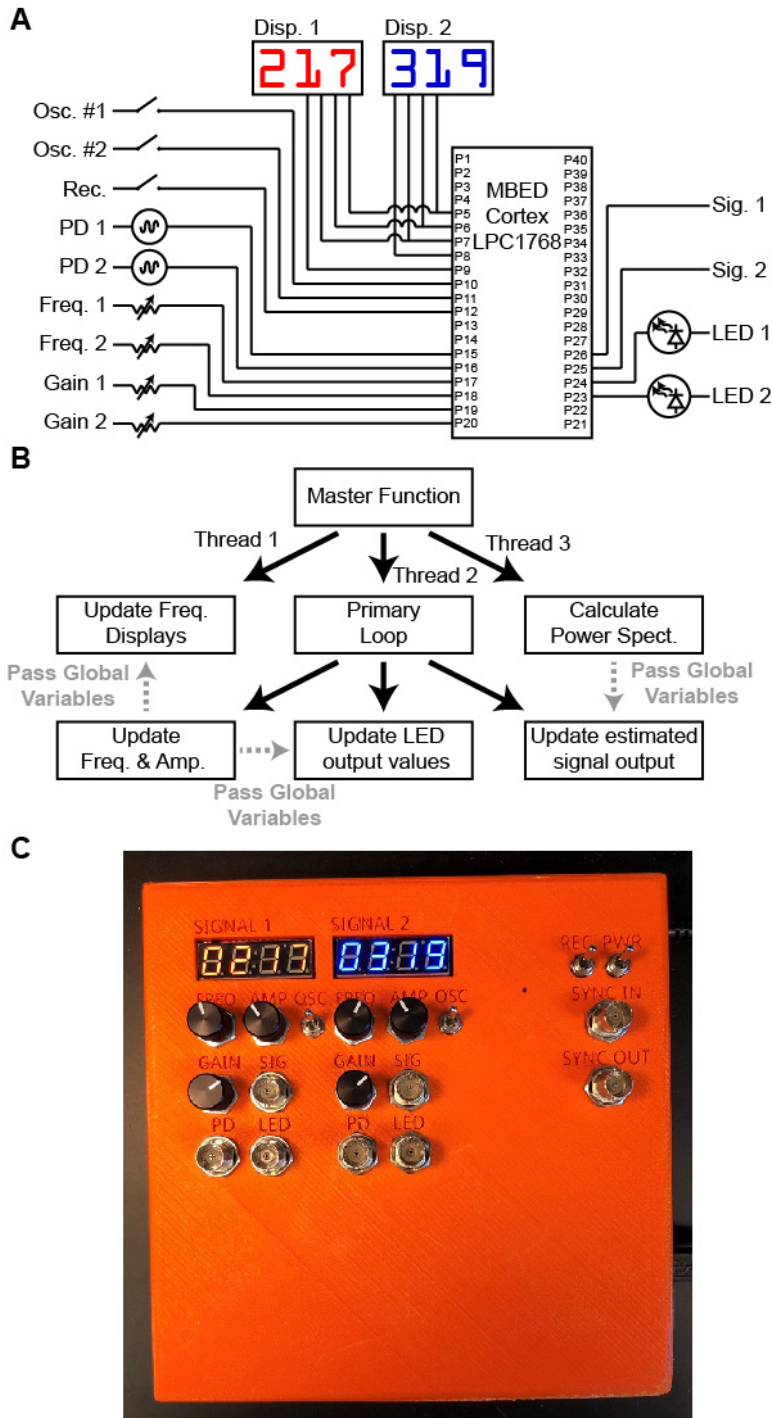

332

333

334 **Figure 2. Microcontroller firmware for LED control and on-line readout of fluorescence**

335 **signal.** A, Connectivity of MBED Cortex LPC1768 microcontroller. B, Schematic of

336 microcontroller firmware. C, Constructed photometry control box.

Figure 3

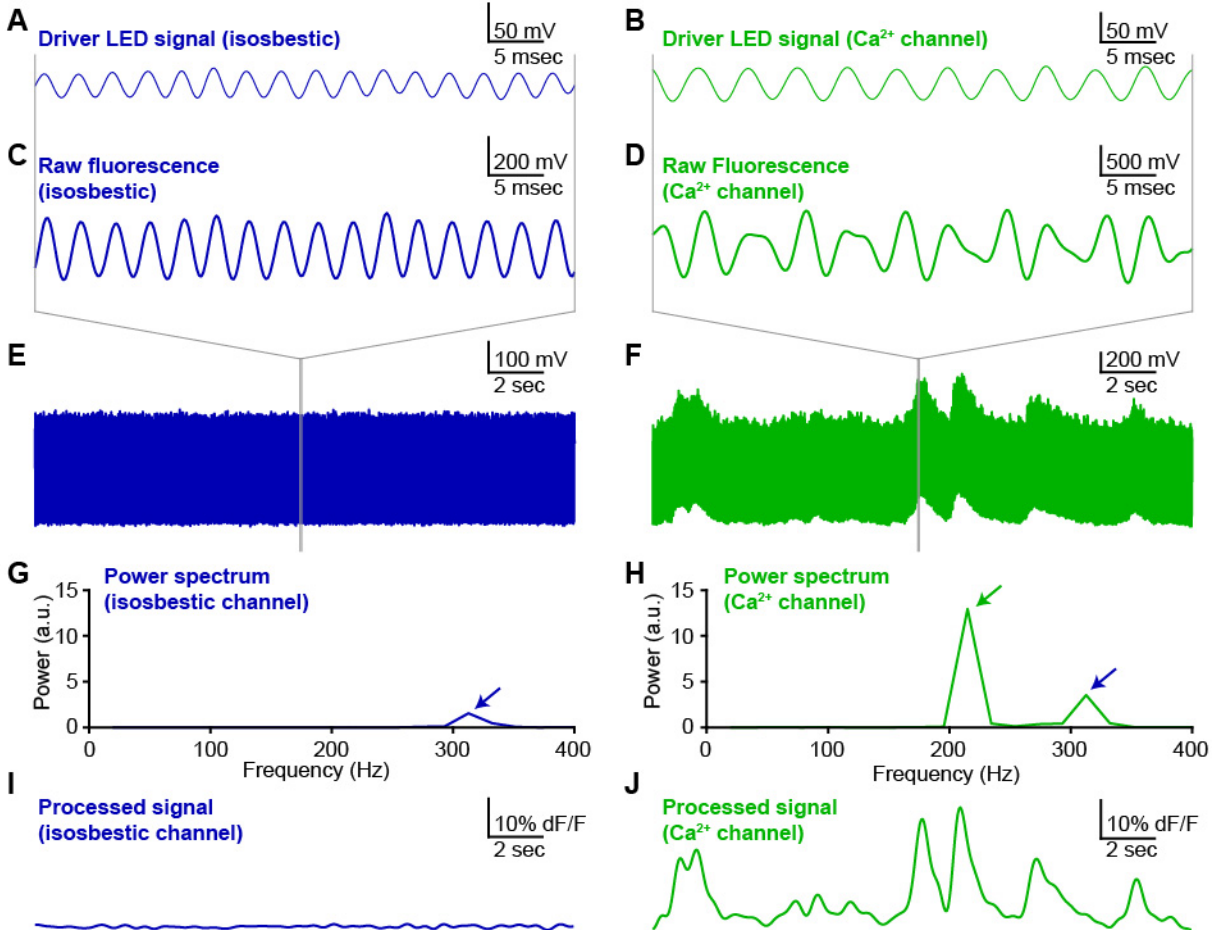

337

338

339 **Figure 3. Oscillating excitation light minimizes background fluorescence and channel**  
340 **cross-talk.** Exemplar photometry recording and analysis from dorsomedial striatum of A2A-cre  
341 mouse expressing GCaMP6m in medium spiny neurons (MSNs) of the indirect pathway. A,B,  
342 Oscillating driver signals for isosbestic channel (Panel A, 405 nm; oscillating at 319 Hz) and  
343 calcium-sensitive channel (Panel B, 465 nm; oscillating at 217 Hz). C,D, Fluorescence signal  
344 from isosbestic channel (Panel C) and calcium-sensitive channel (Panel D) at expanded time  
345 scale to show phase-locked oscillations in fluorescence emission relative to each LED driver  
346 signal (panels A,B above). E,F, Fluorescence measurements for each channel at long time  
347 scale to show stability of isosbestic channel (Panel E) relative to calcium-sensitive fluctuations  
348 in fluorescence (Panel F). G,H, Power spectra calculated from a discrete 50 ms window of each  
349 fluorescence emission signal. Blue arrows indicate the peak corresponding to the isosbestic  
350 channel (405 nm excitation light; oscillation at 319 Hz). Green arrow indicates peak  
351 corresponding to calcium-dependent channel (465 nm excitation light; oscillation at 217 Hz). I,J,  
352 Fluorescence signal for each channel calculated by post-hoc processing over a sliding window  
353 (see methods).

354

## Figure 4

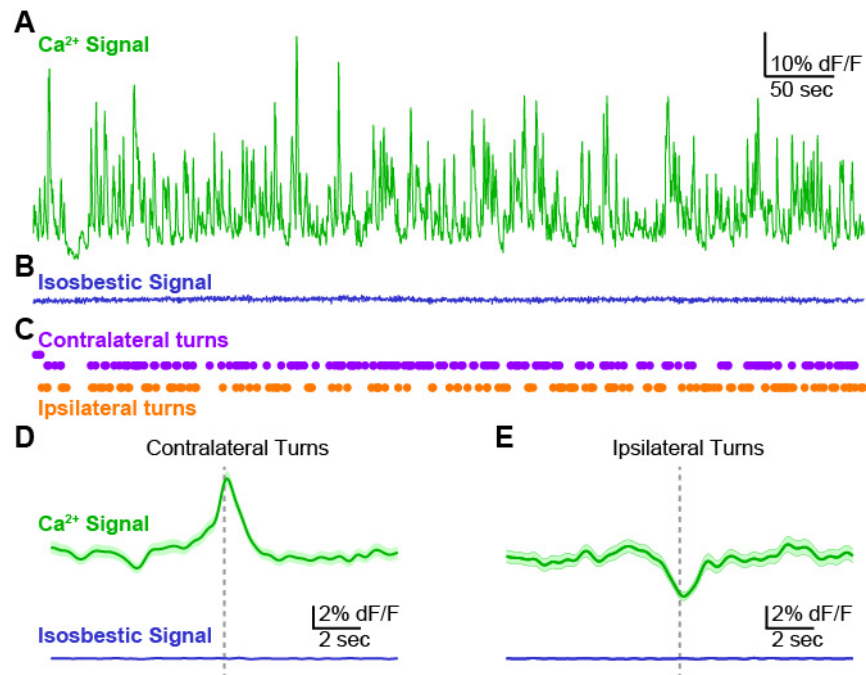

355

356

357 **Figure 4. Validation of photometry system by detection of behaviorally aligned calcium**  
358 **signals.** A, Exemplar recording (10 min) from dorsomedial striatum of an A2A-cre mouse  
359 expressing GCaMP6m in MSNs of the indirect pathway. Calcium-dependent channel. B, Signal  
360 from the control, isosbestic channel recorded simultaneously with the calcium-dependent signal  
361 in Panel A. C, Contralateral and ipsilateral turns detected by automated video tracking of mouse  
362 behavior during the photometry recording session. D,E, Average fluorescence signal aligned to  
363 contralateral (Panel D) and ipsilateral (Panel E) turn events. Signal from calcium-dependent  
364 (top, green) and isosbestic control channel (bottom, blue). Average signal (dark line) plotted  
365 together with standard error (shaded)

366

367

368 **SUPPLEMENTARY INFORMATION**

369 **Table S1. Parts List**

370

| <b>Parts List</b>        |                 |                      |                |                 |
|--------------------------|-----------------|----------------------|----------------|-----------------|
| <b>Component</b>         | <b>Quantity</b> | <b>Vendor</b>        | <b>Part #</b>  | <b>Price</b>    |
| NI-DAQ Digitizer         | 1               | National Instruments | USB-6009       | \$398.00        |
| Custom PCB               | 1               | SEED Studios         |                | \$3.07          |
| MBED Microcontroller     | 1               | Digikey              | 568-4916-ND    | \$52.06         |
| 7-segment display (blue) | 1               | Digikey              | 1568-1346-ND   | \$12.95         |
| 7-segment display (red)  | 1               | Digikey              | 1568-1533-ND   | \$12.95         |
| Toggle switch            | 4               | Digikey              | M2012SS1W15-ND | \$4.51          |
| Potentiometer (10 kOhm)  | 6               | Digikey              | A105799-ND     | \$6.23          |
| Knob                     | 6               | Digikey              | 226-4092-ND    | \$6.44          |
| BNC Connector            | 8               | Digikey              | A32265-ND      | \$3.80          |
| BNC Nut                  | 8               | Digikey              | A1128-ND       | \$0.33          |
| Combi-Con Connector      | 1               | Digikey              | 277-6221-ND    | \$17.34         |
| Power connector          | 1               | Digikey              | CP-002B-ND     | \$0.61          |
| Board spacer             | 1               | Digikey              | A108560-ND     | \$9.39          |
| Resistors (5.1 kOhm)     | 6               | Digikey              | 5.1KQBK-ND     | \$0.10          |
| Capacitors (100 nF)      | 4               | Digikey              | BC2665CT-ND    | \$0.23          |
| Operational Amplifier    | 1               | Digikey              | 296-9542-5-ND  | \$0.40          |
| 5V linear power supply   | 1               | Jameco               | 168605         | \$10.95         |
| Plastic tapping screws   | 11              | McMaster-Carr        | 94629A560      | \$0.54          |
| 3D printed enclosure     | 1               | -                    | -              | -               |
|                          |                 |                      |                |                 |
| <b>Total</b>             |                 |                      |                | <b>\$652.28</b> |

371

372

373 **METHODS**

374 *Design and construction of custom-built hardware*

375 The hardware was initially assembled using a prototyping board, short lengths of hook-up  
376 wire and direct soldering of individual components. This stage was essential to identify,  
377 troubleshoot and correct design flaws. For example, in the first iteration the pulse-width  
378 modulated outputs from the MBED microcontroller were connected directly to the analog inputs  
379 on the digitizer. This resulted in aliasing artifacts that were eliminated by introducing an RC filter  
380 and a voltage follower amplifier on each channel in the final design. Once the design was  
381 finalized and validated, a printed circuit board (PCB) was designed and independently tested.

382 *Microcontroller firmware design*

383 The microcontroller firmware was written using the ARM MBED online compiler  
384 (<http://os.mbed.com/compiler>). The RTOS library (<http://os.mbed.com/handbook/RTOS>) was  
385 imported to support multi-threaded operation. The FFT function was adapted from standard C++  
386 implementations of Fast Fourier Transforms (e.g. <http://www.drdoobs.com/cpp>). All other  
387 functions were written specifically for this application. A pre-compiled binary file is available for

388 download that can simply be copied to the MBED microcontroller by “drag-and-drop” over a  
389 USB connection from any modern PC. The code is available here  
390 <https://hackaday.io/project/160397> for users who wish to customize, modify or improve any  
391 aspect.

### 392 *Animals*

393 1 adult transgenic mouse on a C57BL/6 background aged 3 months was used in the proof-  
394 of-principle open-field recording experiment.

### 395 *Stereotactic surgery*

396 All procedures were in accordance with protocols approved by the UCSF Institutional Animal  
397 Care and Use Committee. The mouse was maintained on a 12/12 light/dark cycle and fed *ad*  
398 *libitum*. Experiments were carried out during the dark cycle. The surgery was carried out in  
399 aseptic conditions while the mouse was anaesthetized with isoflurane (5% for induction, 0.5-  
400 1.5% afterward) in a manual stereotactic frame (Kopf). Buprenorphine HCl (0.1 mg kg<sup>-1</sup>,  
401 intraperitoneal injection) and Ketoprofen (5 mg kg<sup>-1</sup>, subcutaneous injection) were used for  
402 postoperative analgesia. The mouse was allowed to recover for ~3 weeks before recording.

### 403 *Virus injection*

404 We injected 1  $\mu$ L of adeno-associated virus serotype 1 (AAV1) carrying the calcium indicator  
405 GCaMP6m in a double-floxed inverted open reading frame under the control of the Synapsin  
406 promoter (AAV1-hSyn-Flex-GCaMP6m). Virus was obtained from the University of  
407 Pennsylvania Vector Core. The virus was injected bilaterally into dorsal striatum of an adult  
408 mouse in a stereotactic surgery as described above, at coordinates +1.0 anteroposterior (AP),  
409 +/-1.5 mediolateral (ML), and -2.5 dorsoventral (DV), measured from bregma on the skull  
410 surface. Injections were performed using a glass injector pipette and a Micro-4 Injector system  
411 (World Precision Instruments, Inc). The needle was held in place for 1 min before the start of  
412 injection, injection speed was 100 nL min<sup>-1</sup>, and the injection needle was raised 5 minutes after  
413 completion of virus delivery.

### 414 *Optical fiber implants*

415 After virus injection (as described above), a pair of optical fibers (0.48 NA; 400  $\mu$ m diameter)  
416 epoxied to stainless steel fiber optic ferrules (2.5 mm diameter) were implanted in the same  
417 surgery. Fiber tip was placed approximately 100  $\mu$ m above the center of the virus infection zone,  
418 at coordinates +1.0 AP, +/-1.5 ML, -2.4 DV from bregma. Dental adhesive (C&B Metabond,  
419 Parkell) was used to fix the ferrule in place and coat the surface of the skull. Finally, the skull  
420 surface and implant were coated with dental acrylic (Ortho-Jet, Lang Dental). After the cement  
421 dried, the scalp was sutured shut.

### 422 *Open field behavior tracking*

423 Locomotion was tracked in a brightly lit open-field arena using an overhead camera and  
424 post-hoc tracking software (Noldus, Inc). Videos of behavior were recorded from overhead and  
425 side views. Rotations (continuous rotational movements over >90 degrees) were tracked using  
426 automated detection of the nose and tail positions from post-hoc video analysis.  
427 Synchronization TTL pulses were generated once per minute and digitized by the photometry  
428 system alongside the fluorescence measurement to align fluorescence measurements to  
429 behavioral events. These pulses were digitized together with the photometry signal, using the  
430 “Sync In” input on the photometry system. These pulses were detected off-line with a post-hoc

431 analysis script and used to align the time-stamps from the photometry recording to the time-  
432 stamps in the behavioral tracking software (Noldus Ethovision 10). The time of each rotation  
433 was then converted to the equivalent time in the photometry recording.

#### 434 *Fluorescence measurements in vivo*

435 Fluorescence excitation light was generated using two independently driven LEDs. The  
436 driver signal for the violet LED (405 nm) was oscillated at 319 Hz to generate excitation light for  
437 the isosbestic fluorescence channel. The driver signal for the blue LED (465 nm) was oscillated  
438 at 217 Hz to generate excitation light for the calcium-dependent fluorescence channel. Both  
439 fiber-coupled LEDs were purchased from Doric Lenses. The photometry control box described  
440 in this publication was connected to the LED driver by a pair of BNC cables to deliver the driver  
441 signal. The fluorescence mini cube (Doric Lenses) was connected to the intracranial implant on  
442 the mouse's head through an optical fiber (400  $\mu$ m diameter) and a single channel optical  
443 commutator (Doric Lenses). Fluorescence emission light was collected from the intracranial  
444 implant through the same optical fiber and detected using a pair of Newport 2151 Femtowatt  
445 photodetectors (Newport Inc) connected to the fluorescence mini-cube with optical fibers. The  
446 Femtowatt detectors were connected to the photometry box "Photodiode" inputs by BNC  
447 connectors for digitization and analysis of the fluorescence signal.

#### 448 *Signal digitization and off-line analysis*

449 The signal from the two photodiodes was split and sent directly to the digitizer for recording  
450 of the raw signal, and to the microcontroller for on-line estimation of the signal amplitude. All  
451 signals, including estimated fluorescence (channels 1 and 2), LED driver (channels 3 and 4),  
452 raw fluorescence (channels 5 and 6), and TTL synchronization pulses (channels 7 and 8) were  
453 digitized continuously at 5 kHz throughout the duration of the experiment. Raw traces plotted in  
454 Figure 3A-F were low-pass filtered at 400 Hz for clarity of presentation. In addition to generating  
455 the oscillating sine wave driver signals for each fluorescence excitation LED, the microcontroller  
456 performs an on-line calculation of the approximate signal amplitudes using a discrete window  
457 Fast-Fourier Transform. This signal is valuable when optimizing experimental conditions and  
458 assessing the progress of a recording in situ. For final results, however, we strongly recommend  
459 off-line post-hoc analysis of the raw fluorescence signals. This allows for better temporal fidelity  
460 by using sliding filter windows and removal of filter lags by zero-lag filtering (which is impossible  
461 in any on-line filter). A Matlab script (available for download with the rest of the materials) will  
462 accomplish this, reading in data directly from a WinEDR data file and processing the results to  
463 pull out the signal with a zero-lag filter.

464

#### 465 **Data Availability**

466 All data are available upon request. Full parts lists, assembly instructions, compiled  
467 firmware, source code and analysis scripts are freely available here:

468 <https://hackaday.io/project/160397>

469

#### 470 **ACKNOWLEDGEMENTS**

471 We thank Benjamin Margolin and Aphroditi Mamaligas for assistance with genotyping and  
472 testing, and Mattias Karlsson for technical discussions. Thank you to Alexxai Kravitz, Richard  
473 Tsien, Thomas Davidson and the A.C.K. laboratory for comments on the manuscript. This work

474 was funded by NIH R01 NS078435, F32 NS083369 (to S.F.O.) and K99 MH110597 (to S.F.O.),  
475 and RR018928 (to the Gladstone Institutes)

476

## 477 **AUTHOR CONTRIBUTIONS**

478 S.F.O. designed the hardware, software and firmware, constructed the apparatus,  
479 performed experiments, analyzed data and wrote the manuscript. A.C.K. designed experiments  
480 and wrote the manuscript.

481

## 482 **COMPETING FINANCIAL INTERESTS**

483 The authors have no competing financial interests to disclose.

484

## 485 **KEYWORDS**

486 Optical fibers; biophotonics; fluorescence; photometry; microcontrollers; open-source; GCaMP;  
487 basal ganglia

488

## 489 **References**

490 Adelsberger, H., O. Garaschuk and A. Konnerth (2005). "Cortical calcium waves in resting  
491 newborn mice." Nat Neurosci **8**(8): 988-990.

492 Akerboom, J., N. Carreras Calderon, L. Tian, S. Wabnig, M. Prigge, J. Tolo, A. Gordus, M. B.  
493 Orger, K. E. Severi, J. J. Macklin, R. Patel, S. R. Pulver, T. J. Wardill, E. Fischer, C. Schuler, T.  
494 W. Chen, K. S. Sarkisyan, J. S. Marvin, C. I. Bargmann, D. S. Kim, S. Kugler, L. Lagnado, P.  
495 Hegemann, A. Gottschalk, E. R. Schreiter and L. L. Looger (2013). "Genetically encoded  
496 calcium indicators for multi-color neural activity imaging and combination with optogenetics."  
497 Front Mol Neurosci **6**: 2.

498 Akerboom, J., T. W. Chen, T. J. Wardill, L. Tian, J. S. Marvin, S. Mutlu, N. C. Calderon, F.  
499 Esposti, B. G. Borghuis, X. R. Sun, A. Gordus, M. B. Orger, R. Portugues, F. Engert, J. J.  
500 Macklin, A. Filosa, A. Aggarwal, R. A. Kerr, R. Takagi, S. Kracun, E. Shigetomi, B. S. Khakh, H.  
501 Baier, L. Lagnado, S. S. Wang, C. I. Bargmann, B. E. Kimmel, V. Jayaraman, K. Svoboda, D. S.  
502 Kim, E. R. Schreiter and L. L. Looger (2012). "Optimization of a GCaMP calcium indicator for  
503 neural activity imaging." J Neurosci **32**(40): 13819-13840.

504 Aravanis, A. M., L. P. Wang, F. Zhang, L. A. Meltzer, M. Z. Mogri, M. B. Schneider and K.  
505 Deisseroth (2007). "An optical neural interface: in vivo control of rodent motor cortex with  
506 integrated fiberoptic and optogenetic technology." J Neural Eng **4**(3): S143-156.

507 Chen, T. W., T. J. Wardill, Y. Sun, S. R. Pulver, S. L. Renninger, A. Baohan, E. R. Schreiter, R.  
508 A. Kerr, M. B. Orger, V. Jayaraman, L. L. Looger, K. Svoboda and D. S. Kim (2013).  
509 "Ultrasensitive fluorescent proteins for imaging neuronal activity." Nature **499**(7458): 295-300.



- 510 Cui, G., S. B. Jun, X. Jin, G. Luo, M. D. Pham, D. M. Lovinger, S. S. Vogel and R. M. Costa  
511 (2014). "Deep brain optical measurements of cell type-specific neural activity in behaving mice."  
512 Nat Protoc **9**(6): 1213-1228.
- 513 Cui, G., S. B. Jun, X. Jin, M. D. Pham, S. S. Vogel, D. M. Lovinger and R. M. Costa (2013).  
514 "Concurrent activation of striatal direct and indirect pathways during action initiation." Nature  
515 **494**(7436): 238-242.
- 516 Dana, H., B. Mohar, Y. Sun, S. Narayan, A. Gordus, J. P. Hasseman, G. Tsegaye, G. T. Holt, A.  
517 Hu, D. Walpita, R. Patel, J. J. Macklin, C. I. Bargmann, M. B. Ahrens, E. R. Schreiter, V.  
518 Jayaraman, L. L. Looger, K. Svoboda and D. S. Kim (2016). "Sensitive red protein calcium  
519 indicators for imaging neural activity." Elife **5**.
- 520 Delmans, M. H., J. (2018). "uCube: A Framework for 3D Printable Optomechanics." Journal of  
521 Open Hardware **2**(1): 2.
- 522 Gong, Y., C. Huang, J. Z. Li, B. F. Grewe, Y. Zhang, S. Eismann and M. J. Schnitzer (2015).  
523 "High-speed recording of neural spikes in awake mice and flies with a fluorescent voltage  
524 sensor." Science **350**(6266): 1361-1366.
- 525 Gong, Y., M. J. Wagner, J. Zhong Li and M. J. Schnitzer (2014). "Imaging neural spiking in brain  
526 tissue using FRET-opsin protein voltage sensors." Nat Commun **5**: 3674.
- 527 Gunaydin, L. A., L. Grose, J. C. Finkelstein, I. V. Kauvar, L. E. Fenno, A. Adhikari, S.  
528 Lammel, J. J. Mirzabekov, R. D. Airan, K. A. Zalocusky, K. M. Tye, P. Anikeeva, R. C. Malenka  
529 and K. Deisseroth (2014). "Natural neural projection dynamics underlying social behavior." Cell  
530 **157**(7): 1535-1551.
- 531 Inoue, M., A. Takeuchi, S. Horigane, M. Ohkura, K. Gengyo-Ando, H. Fujii, S. Kamijo, S.  
532 Takemoto-Kimura, M. Kano, J. Nakai, K. Kitamura and H. Bito (2015). "Rational design of a  
533 high-affinity, fast, red calcium indicator R-CaMP2." Nat Methods **12**(1): 64-70.
- 534 Jing, M., P. Zhang, G. Wang, J. Feng, L. Mesik, J. Zeng, H. Jiang, S. Wang, J. C. Looby, N. A.  
535 Guagliardo, L. W. Langma, J. Lu, Y. Zuo, D. A. Talmage, L. W. Role, P. Q. Barrett, L. I. Zhang,  
536 M. Luo, Y. Song, J. J. Zhu and Y. Li (2018). "A genetically encoded fluorescent acetylcholine  
537 indicator for in vitro and in vivo studies." Nat Biotechnol.
- 538 Kim, C. K., S. J. Yang, N. Pichamoorthy, N. P. Young, I. Kauvar, J. H. Jennings, T. N. Lerner, A.  
539 Berndt, S. Y. Lee, C. Ramakrishnan, T. J. Davidson, M. Inoue, H. Bito and K. Deisseroth (2016).  
540 "Simultaneous fast measurement of circuit dynamics at multiple sites across the mammalian  
541 brain." Nat Methods **13**(4): 325-328.
- 542 Lerner, T. N., C. Shilyansky, T. J. Davidson, K. E. Evans, K. T. Beier, K. A. Zalocusky, A. K.  
543 Crow, R. C. Malenka, L. Luo, R. Tomer and K. Deisseroth (2015). "Intact-Brain Analyses Reveal  
544 Distinct Information Carried by SNc Dopamine Subcircuits." Cell **162**(3): 635-647.

- 545 Li, Y. and R. W. Tsien (2012). "pHTomato, a red, genetically encoded indicator that enables  
546 multiplex interrogation of synaptic activity." Nat Neurosci **15**(7): 1047-1053.
- 547 Markowitz, J. E., W. F. Gillis, C. C. Beron, S. Q. Neufeld, K. Robertson, N. D. Bhagat, R. E.  
548 Peterson, E. Peterson, M. Hyun, S. W. Linderman, B. L. Sabatini and S. R. Datta (2018). "The  
549 Striatum Organizes 3D Behavior via Moment-to-Moment Action Selection." Cell **174**(1): 44-58  
550 e17.
- 551 Marshall, J. D., J. Z. Li, Y. Zhang, Y. Gong, F. St-Pierre, M. Z. Lin and M. J. Schnitzer (2016).  
552 "Cell-Type-Specific Optical Recording of Membrane Voltage Dynamics in Freely Moving Mice."  
553 Cell **167**(6): 1650-1662 e1615.
- 554 Meng, C., J. Zhou, A. Papaneri, T. Peddada, K. Xu and G. Cui (2018). "Spectrally Resolved  
555 Fiber Photometry for Multi-component Analysis of Brain Circuits." Neuron **98**(4): 707-717 e704.
- 556 Miesenbock, G., D. A. De Angelis and J. E. Rothman (1998). "Visualizing secretion and synaptic  
557 transmission with pH-sensitive green fluorescent proteins." Nature **394**(6689): 192-195.
- 558 Okumoto, S., L. L. Looger, K. D. Micheva, R. J. Reimer, S. J. Smith and W. B. Frommer (2005).  
559 "Detection of glutamate release from neurons by genetically encoded surface-displayed FRET  
560 nanosensors." Proc Natl Acad Sci U S A **102**(24): 8740-8745.
- 561 Patriarchi, T., J. R. Cho, K. Merten, M. W. Howe, A. Marley, W. H. Xiong, R. W. Folk, G. J.  
562 Broussard, R. Liang, M. J. Jang, H. Zhong, D. Dombeck, M. von Zastrow, A. Nimmerjahn, V.  
563 Gradinaru, J. T. Williams and L. Tian (2018). "Ultrafast neuronal imaging of dopamine dynamics  
564 with designed genetically encoded sensors." Science **360**(6396).
- 565 San Martin, A., S. Ceballo, F. Baeza-Lehnert, R. Lerchundi, R. Valdebenito, Y. Contreras-  
566 Baeza, K. Alegria and L. F. Barros (2014). "Imaging mitochondrial flux in single cells with a  
567 FRET sensor for pyruvate." PLoS One **9**(1): e85780.
- 568 Simone, K., T. Fuzesi, D. Rosenegger, J. Bains and K. Murari (2018). "Open-source, cost-  
569 effective system for low-light in vivo fiber photometry." Neurophotonics **5**(2): 025006.
- 570 Sparta, D. R., A. M. Stamatakis, J. L. Phillips, N. Hovelso, R. van Zessen and G. D. Stuber  
571 (2011). "Construction of implantable optical fibers for long-term optogenetic manipulation of  
572 neural circuits." Nat Protoc **7**(1): 12-23.
- 573 Sun, F., J. Zeng, M. Jing, J. Zhou, J. Feng, S. F. Owen, Y. Luo, F. Li, H. Wang, T. Yamaguchi,  
574 Z. Yong, Y. Gao, W. Peng, L. Wang, S. Zhang, J. Du, D. Lin, M. Xu, A. C. Kreitzer, G. Cui and  
575 Y. Li (2018). "A Genetically Encoded Fluorescent Sensor Enables Rapid and Specific Detection  
576 of Dopamine in Flies, Fish, and Mice." Cell **174**(2): 481-496 e419.
- 577 Wimmer, R. D., L. I. Schmitt, T. J. Davidson, M. Nakajima, K. Deisseroth and M. M. Halassa  
578 (2015). "Thalamic control of sensory selection in divided attention." Nature **526**(7575): 705-709.

579 Wu, J., A. S. Abdelfattah, L. S. Miraucourt, E. Kutsarova, A. Ruangkittisakul, H. Zhou, K.  
580 Ballanyi, G. Wicks, M. Drobizhev, A. Rebane, E. S. Ruthazer and R. E. Campbell (2014). "A  
581 long Stokes shift red fluorescent Ca<sup>2+</sup> indicator protein for two-photon and ratiometric imaging."  
582 Nat Commun **5**: 5262.

583 Zhao, Y., S. Araki, J. Wu, T. Teramoto, Y. F. Chang, M. Nakano, A. S. Abdelfattah, M. Fujiwara,  
584 T. Ishihara, T. Nagai and R. E. Campbell (2011). "An expanded palette of genetically encoded  
585 Ca(2)(+) indicators." Science **333**(6051): 1888-1891.

586
